# Supplementary material
Source: PubMed Central journal article supplement (PMC3040498)
Supplement: 97320630005191S1.pdf [file 97320630005191S1.pdf]

### Supplementary material:

**Table 1:** The types of bacterial endophytes (putative) isolated from *Gynura procumbens* leaves; bacterial endophytes were identified based on analysis of PCR amplified 16S ribosomal DNA (rDNA) sequence

| Clone ID | Name of endophyte                  | Source      | Length of analyzed 16S rDNA (bp) | GenBank accession number |
|----------|------------------------------------|-------------|----------------------------------|--------------------------|
| Gpe1     | <i>Pseudomonas resinovorans</i>    | Leaf tissue | 707                              | HM104471                 |
| Gpe2     | <i>Paenibacillus polymyxa</i>      | Leaf tissue | 725                              | HM104472                 |
| Gpe3     | <i>Acinetobacter calcoaceticus</i> | Leaf tissue | 708                              | HM104473                 |

**Table 2:** The source and geographical locations of *Pseudomonas resinovorans*, *Paenibacillus polymyxa*, and *Acinetobacter calcoaceticus* strains used in dendrogram construction.

| Strain                                               | Source                               | Reported from (Country) | 16S rDNA length(bp) compared | 16S rDNA Accession No |
|------------------------------------------------------|--------------------------------------|-------------------------|------------------------------|-----------------------|
| <i>Pseudomonas resinovorans</i> strain AIMST Gpe1    | <i>Gynura procumbens</i> Leaf tissue | Malaysia                | 707                          | HM104471              |
| <i>P. resinovorans</i> strain P-1                    | Enriched mixed cultures              | Taiwan                  | 1390                         | EU497964              |
| <i>P. resinovorans</i> strain B84                    | Turf grass rhizosphere soil          | China                   | 900                          | DQ335102              |
| <i>P. resinovorans</i> strain ATCC 14235T            | Unknown                              | Japan                   | 1507                         | AB021373              |
| <i>P. resinovorans</i> strain LAM 9                  | Contaminated soil                    | Italy                   | 1452                         | EU019983              |
| <i>P. resinovorans</i> strain LMG 2274               | Culture collection                   | USA                     | 1465                         | NR_026534             |
| <i>P. resinovorans</i> strain mol11                  | soil                                 | Korea                   | 740                          | HM031472              |
| <i>Paenibacillus polymyxa</i> strain AIMST Gpe2      | <i>Gynura procumbens</i> Leaf tissue | Malaysia                | 725                          | HM104472              |
| <i>P. polymyxa</i> strain YRL13                      | Young radish                         | Korea                   | 1522                         | EU373421              |
| <i>P. polymyxa</i> strain 12170504                   | Sugar beet field                     | China                   | 885                          | EU563233              |
| <i>P. polymyxa</i> strain Jaas cd                    | Cotton                               | China                   | 1436                         | AY942618              |
| <i>P. polymyxa</i> strain ISSDS-852                  | Agricultural soil                    | Italy                   | 1484                         | EF634025              |
| <i>P. polymyxa</i> strain isolate TN103              | Averno lake sediment                 | Italy                   | 1421                         | EU362613              |
| <i>P. polymyxa</i> strain 1851                       | Soil                                 | China                   | 1442                         | EU982546              |
| <i>P. polymyxa</i> strain GBR-602                    | Ginseng                              | Korea                   | 1441                         | AY359631              |
| <i>Acinetobacter calcoaceticus</i> strain AIMST Gpe3 | <i>Gynura procumbens</i> Leaf tissue | Malaysia                | 708                          | HM104473              |
| <i>A. calcoaceticus</i> strain PUCM1011              | Soil                                 | India                   | 1422                         | FJ816058              |
| <i>A. calcoaceticus</i> strain LCR102                | Paddy field soil                     | India                   | 1391                         | FJ976611              |
| <i>A. calcoaceticus</i>                              | Paddy field soil                     | India                   | 1383                         | FJ976599              |
| <i>A. calcoaceticus</i> strain BA60                  | <i>Homo sapiens</i> blood culture    | China                   | 1334                         | FJ263920              |
| <i>A. calcoaceticus</i> strain HIRFA36               | Rhizosphere of Wheat                 | India                   | 1471                         | EU921468              |
| <i>A. calcoaceticus</i> strain HIRFA33               | Rhizosphere of Wheat                 | India                   | 1471                         | EU921466              |
| <i>A. calcoaceticus</i>                              | Offshore oil field                   | China                   | 1447                         | DQ187381              |
